# Supplementary material for: Porous SnO2 nanowire bundles for photocatalyst and Li ion battery applications
Source: Royal Society of Chemistry journal article supplement (doi:10.1039/c1ce05171g), 2011-01-01

## Porous SnO<sub>2</sub> Nanowire Bundles for Photocatalyst and Li Ion Battery

### Applications

Yutao Han<sup>a</sup>, Xiang Wu<sup>a,\*</sup>, Yulin Ma<sup>b</sup>, Lihong Gong<sup>a</sup>, Fengyu Qu<sup>a</sup>, Hongjin Fan<sup>c,\*</sup>

<sup>a</sup> Key Laboratory of Design and Synthesis of Functional Materials and Green Catalysis, Colleges of Heilongjiang Province, College of Chemistry and Chemical Engineering, Harbin Normal University, Harbin 150025, P. R. China

<sup>b</sup> College of Chemical Engineering and Technology, Harbin Institute of Technology, Harbin 150001, P. R. China

<sup>c</sup> Division of Physics and Applied Physics, School of Physical and Mathematical Sciences, Nanyang Technological University, 637371 Singapore

The SEM images of porous SnO<sub>2</sub> nanowires after 20 cycles electrochemical measurements is shown as follow.

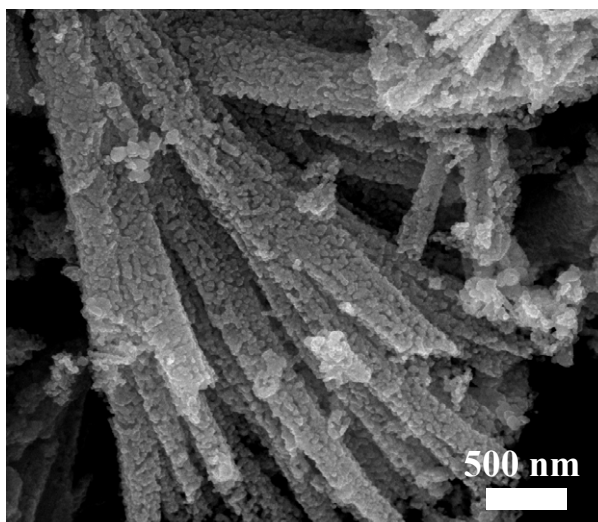

Supplement: c1ce05171g.pdf [file c1ce05171g.pdf]
